# Supplementary material
Source: publisher site journal article supplement (https://www.dovepress.com/article/618588)
Supplement: Supplementary file 1 [file 618588%20Revised%20Supplementary%20Materials.docx]

**Supplementary Figure 1: Structure of Diosmin.**


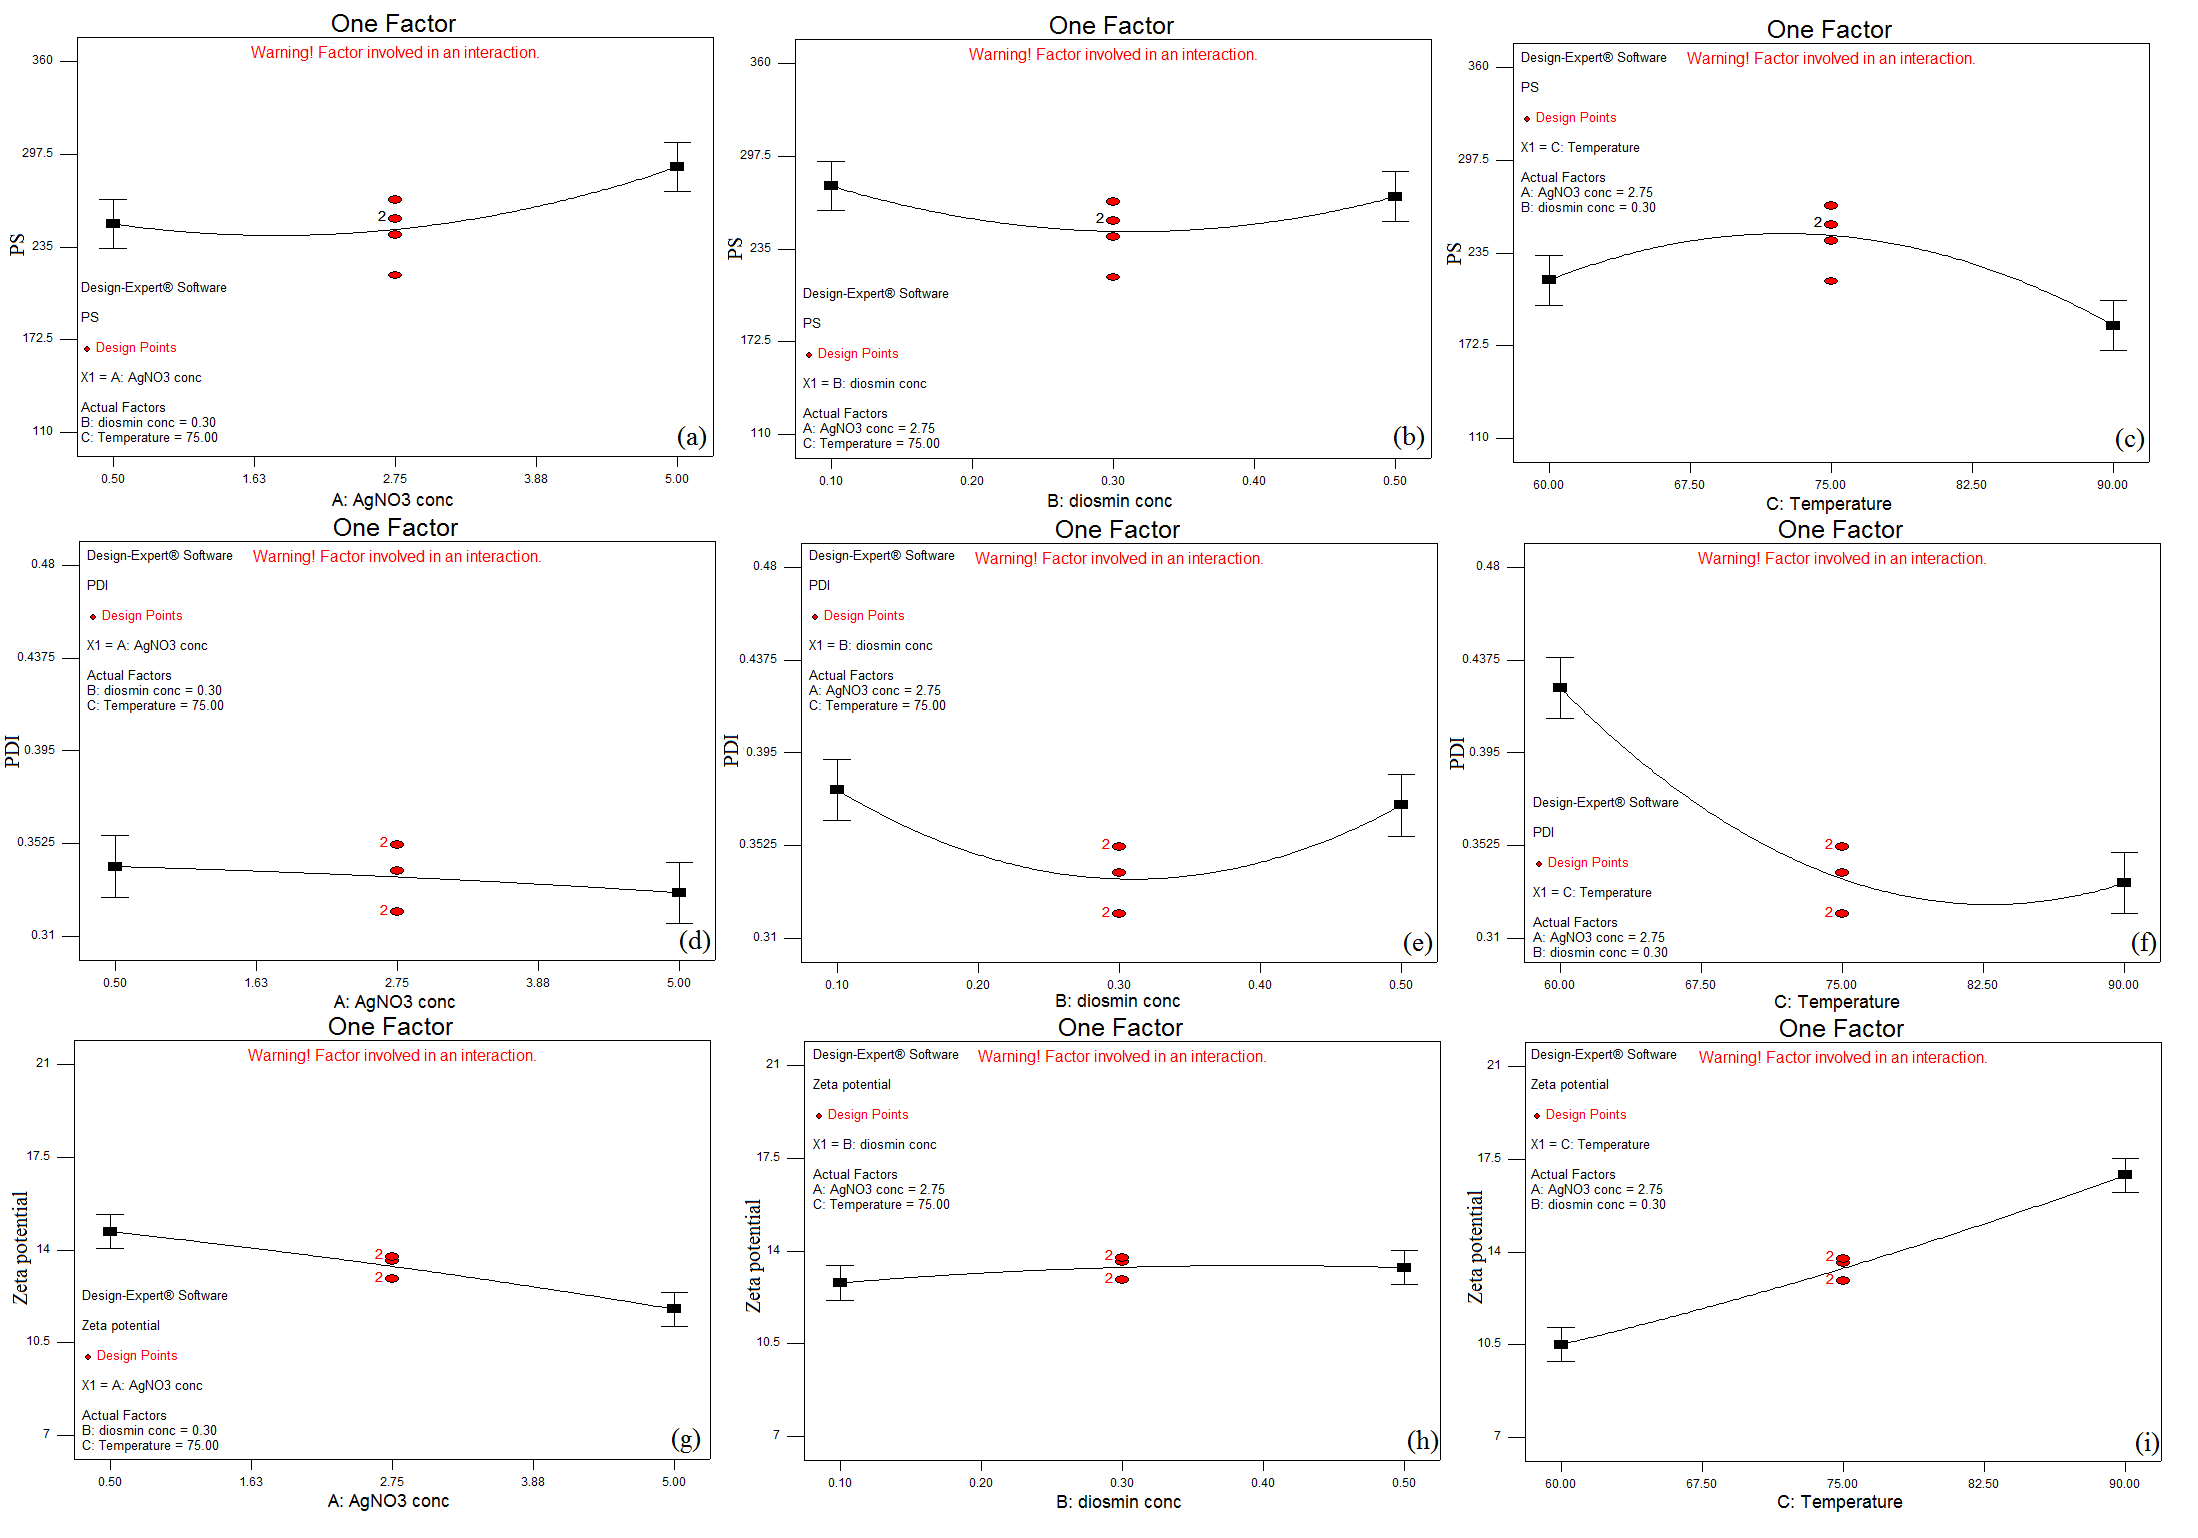


**Supplementary Figure 2: One factor effect of the three design critical material attributes namely, A: AgNO3 concentration, B: Diosmin concentration and C: Temperature on the critical quality attributes namely, PS (a, b, and c), PDI (d, e, and f) and ZP (g, h, and i) of Diosmin-loaded AgNPs.**

**Supplementary Table 1: Significance of CMA effects and interactions on PS, PDI, and ZP of Diosmin-loaded AgNPs**

| Factor | CQA | Sum of squares | Df | Mean square | *F* value | *P* value  Prob>*F* | Significance (*P*<0.05) |
| --- | --- | --- | --- | --- | --- | --- | --- |
| Model | PS | 46425 | 7 | 6632.22 | 13.56 | 0.0004 | Significant |
| PDI | 0.042 | 7 | 4.708E-003 | 24.20 | 0.0002 | Significant |
| ZP | 200.45 | 9 | 22.27 | 54.04 | 0.0002 | Significant |
| A  (AgNO3 concentration)  (mM) | PS | 2964.50 | 1 | 2964.50 | 10.77 | 0.0135 | Significant |
| PDI | 2.880E-004 | 1 | 2.88E-005 | 1.48 | 0.2631 | Non-significant |
| ZP | 17.17 | 1 | 17.17 | 41.66 | 0.0003 | Significant |
| B  (Diosmin concentration)  (mM) | PS | 103.68 | 1 | 103.68 | 0.38 | 0.5588 | Non-significant |
| PDI | 9.800E-005 | 1 | 9.800E-005 | 0.50 | 0.5008 | Non-significant |
| ZP | 0.66 | 1 | 0.66 | 1.60 | 0.2458 | Non-significant |
| C  (Temperature)  (°C) | PS | 1860.50 | 1 | 1860.50 | 6.76 | 0.0354 | Significant |
| PDI | 0.016 | 1 | 0.016 | 82.35 | <0.0001 | Significant |
| ZP | 82.05 | 1 | 82.05 | 199.07 | <0.0001 | Significant |
| AB | PS | 8372.25 | 1 | 8372.25 | 30.41 | 0.0009 | Significant |
| PDI | 9.120E-003 | 1 | 9.120E-003 | 46.88 | 0.0002 | Significant |
| ZP | 60.06 | 1 | 60.06 | 145.73 | <0.0001 | Significant |
| AC | PS | 22022.56 | 1 | 11011.56 | 45.04 | <0.0001 | Significant |
| PDI | 2.256E-003 | 1 | 2.256E-003 | 11.60 | 0.0114 | Significant |
| ZP | 22.00 | 1 | 22.00 | 53.37 | 0.0002 | Significant |
| BC | PS | 265.69 | 1 | 265.69 | 0.97 | 0.3586 | Non-significant |
| PDI | 2.402E-004 | 1 | 2.402E-004 | 1.23 | 0.3032 | Non-significant |
| ZP | 17.64 | 1 | 17.64 | 42.80 | 0.0003 | Significant |
| A2 | PS | 2208.04 | 1 | 2208.04 | 8.02 | 0.0253 | Significant |
| PDI | 6.318E-006 | 1 | 6.318E-006 | 0.032 | 0.8621 | Non-significant |
| ZP | 0.10 | 1 | 0.10 | 0.25 | 0.6355 | Non-significant |
| B2 | PS | 3080.85 | 1 | 3080.85 | 11.19 | 0.0123 | Significant |
| PDI | 5.850E-003 | 1 | 5.850E-003 | 30.07 | 0.0009 | Significant |
| ZP | 0.38 | 1 | 0.38 | 0.92 | 0.3696 | Non-significant |
| C2 | PS | 8716.84 | 1 | 8716.84 | 31.66 | 0.0008 | Significant |
| PDI | 7.704E-003 | 1 | 7.704E-003 | 39.60 | 0.0004 | Significant |
| ZP | 0.43 | 1 | 0.43 | 1.05 | 0.3404 | Non-significant |
| Residual | PS | 1927.22 | 7 | 275.32 |  |  |  |
| PDI | 1.362E-003 | 7 | 1.945E-004 |  |  |  |
| ZP | 2.89 | 7 | 0.41 |  |  |  |
| Lack of fit | PS | 441.54 | 3 | 147.18 | 0.40 | 0.7635 | Non-significant |
| PDI | 3.910E-004 | 3 | 1.303E-004 | 0.54 | 0.6816 | Non-significant |
| ZP | 2.10 | 3 | 0.70 | 3.58 | 0.1249 | Non-significant |
| Pure Error | PS | 1485.68 | 4 | 371.42 |  |  |  |
| PDI | 9.708E-004 | 4 | 2.427E-004 |  |  |  |
| ZP | 0.78 | 4 | 0.20 |  |  |  |
| Cor Total | PS | 50826.51 | 16 |  |  |  |  |
| PDI | 0.044 | 16 |  |  |  |  |
| ZP | 203.33 | 16 |  |  |  |  |
